# Supplementary material for: Novel Na2TiSiO5 anode material for lithium ion batteries
Source: Royal Society of Chemistry journal article supplement (doi:10.1039/c9cc00043g), 2019-01-01
Supplement: c9cc00043g1.pdf [file c9cc00043g1.pdf]

*Supplementary Information*

Novel Na<sub>2</sub>TiSiO<sub>5</sub> anode material for lithium ion batteries

Di He<sup>a‡</sup>, Tianhao Wu<sup>a‡</sup>, Boya Wang<sup>a</sup>, Yubo Yang<sup>a</sup>, Shu Zhao<sup>a</sup>, Jinshu Wang<sup>\*a</sup> and

Haijun Yu<sup>\*a</sup>

<sup>a</sup>College of Materials Science and Engineering, Key Laboratory of Advanced Functional Materials, Education Ministry of China, Beijing University of Technology, Pingleyuan 100<sup>#</sup>, Chaoyang District, 100124, China.

E-mail: [hj-yu@bjut.edu.cn](mailto:hj-yu@bjut.edu.cn)

E-mail: [wangjsh@bjut.edu.cn](mailto:wangjsh@bjut.edu.cn)

## Experiments

**Material synthesis:** NTSO is synthesized by a hydrothermal method. In a typical process: urea, SiO<sub>2</sub> and TiO<sub>2</sub> with a molar ratio of 0.5:1:1 were dispersed in 15 ml, 10 mol/L NaOH aqueous, then stirred and sonicated for 1 h. The mixed solution was transferred to a Teflon stainless reactor and held at 160 °C for 6 h. The white product was thoroughly washed by water and dried at 80 °C.

**Electrode preparation:** NTSO, acetylene carbon, polyvinylidene fluoride (PVDF, dispersed in N-methyl-2-pyrrolidone solution) are mixed as a weight percent of 7:2:1. Then the slurry is coated on Cu foil by a blade and dried at 80 °C in a vacuum oven. The electrodes are punched into 12 mm disks for battery assembling, the loading mass is about 1 mg/cm<sup>2</sup>. For a typical assembly process: electrode, separator (Celgard 2500) and lithium metal (as a counter electrode, diameter: 10 mm) are encapsulated into a CR2032-type coin cell in a glovebox filled with argon. The electrolyte is made up from 1 M LiPF<sub>6</sub> in EC/DEC (1:1 vol.%). The working potential ranges from 0.1 to 3 V.

**Characterization:** X-Ray diffraction (XRD) patterns for Rietveld analysis are recorded by D8 Advance (Bruker) setting at 40 kV/40 mA with a Cu target (Kα<sub>1</sub> radiation, λ = 0.1541 nm, 0.8 s/step), the 2θ degree ranges from 10-120°. The Rietveld analysis is based on a Topas software for cell parameters simulation. Cyclic voltammetry (CV) curves is measured by Solartron Metrology. Battery test is performed on Neware battery test equipment. N<sub>2</sub> isotherm adsorption-desorption measurement is performed by an ASAP 2020 at 77 K.

**Density functional theory (DFT)** method<sup>1,2</sup> are implemented in the Vienna ab initio package (VASP) with pseudopotentials established by the projector-augmented wave (PAW)<sup>3</sup> method and the Perdew–Burke–Ernzerh (PBE).<sup>4</sup> For total energy calculations, we used a cutoff energy of 450 eV to ensure good convergence. The Brillouin zone was adopted with a 2×3×3 Γ-centered k-mesh for 1a×1b×2c supercell (Containing four Na<sub>2</sub>TiSiO<sub>5</sub> molecular units). All structures were relaxed until the energy and force was less than 10<sup>-5</sup> eV and 0.01 eV/Å, respectively. In the GGA +U schemes, U<sub>eff</sub> (U-J) is fixed to 2.5 eV for Ti-3d state.<sup>5,6</sup> The formation energy of insertion lithium atom is given by

$$\Delta E = \frac{E(\text{Na}_2\text{Li}_x\text{TiSiO}_5) - E(\text{Na}_2\text{TiSiO}_5) - xE(\text{Li})}{x} \quad (\text{S1})$$

Where E is the total energy. The E(Li) was obtained by optimization of Li Metal (Imm).

### Reference

- 1 P. Hohenberg and W. Kohn, *Phys. Rev. B*, 1964, **136**, B864.
- 2 W. Kohn and L. J. Sham, *Phys. Rev. A*, 1965, **140**, A1133.
- 3 P. E. Blöchl, *Phys. Rev. B*, 1994, **50**, 17953.
- 4 J. P. Perdew, K. Burke and M. Ernzerhof, *Phys. Rev. Lett.*, 1996, **77**, 3865.
- 5 Z. Hu and H. J. Metiu, *Phys. Chem. C*, 2011, **115**, 5841.
- 6 S. Lutfalla, V. Shapovalov and A. T. Bell, *J. Chem. Theory Comput.*, 2011, **7**, 2218.

Table S1. Refined structure of Na<sub>2</sub>TiSiO<sub>5</sub> obtained from XRD data

| Na <sub>2</sub> TiSiO <sub>5</sub> (P4/nmm space group), $a = b = 6.504(2)$ Å, $c = 5.068(1)$ Å, $V = 214.4(1)$ Å <sup>3</sup> |      |      |          |           |           |        |
|--------------------------------------------------------------------------------------------------------------------------------|------|------|----------|-----------|-----------|--------|
| Atoms                                                                                                                          | Site | x    | y        | z         | Occupancy | B      |
| Ti                                                                                                                             | 2c   | 0.5  | 0        | 0.926(3)  | 1         | 0.3379 |
| Na                                                                                                                             | 4e   | 0.25 | 0.25     | 0.5       | 1         | 0.5796 |
| Si                                                                                                                             | 2a   | 0    | 0        | 0         | 1         | 0.2521 |
| O                                                                                                                              | 8i   | 0    | 0.127(2) | 0.273(4)  | 1         | 0.6646 |
| O                                                                                                                              | 2c   | 0.5  | 0        | -0.576(9) | 1         | 0.504  |

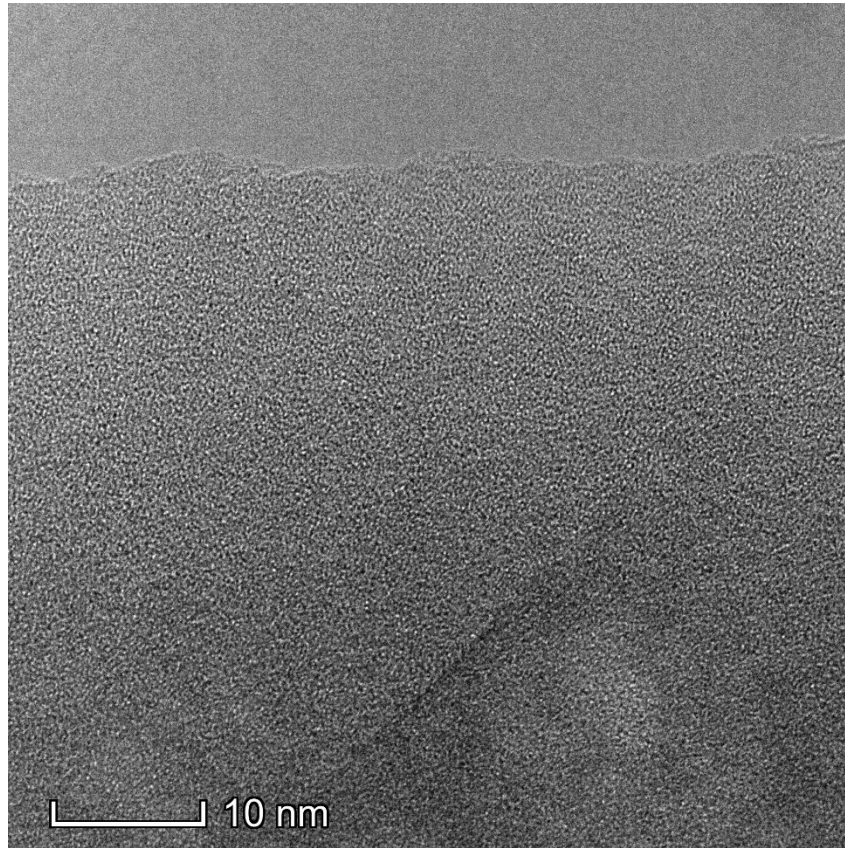

Fig. S1 TEM image of an amorphous region in NTSO.

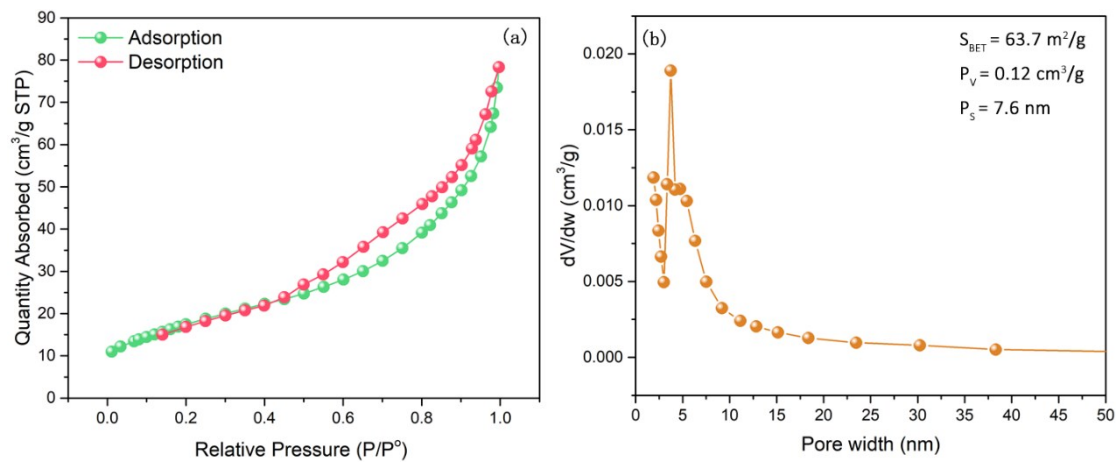

Fig. S2 (a)  $N_2$  isothermal adsorption-desorption curves and (b) pore size distribution plot. ( $P_V$ : pore volume,  $P_S$ : pore size.)

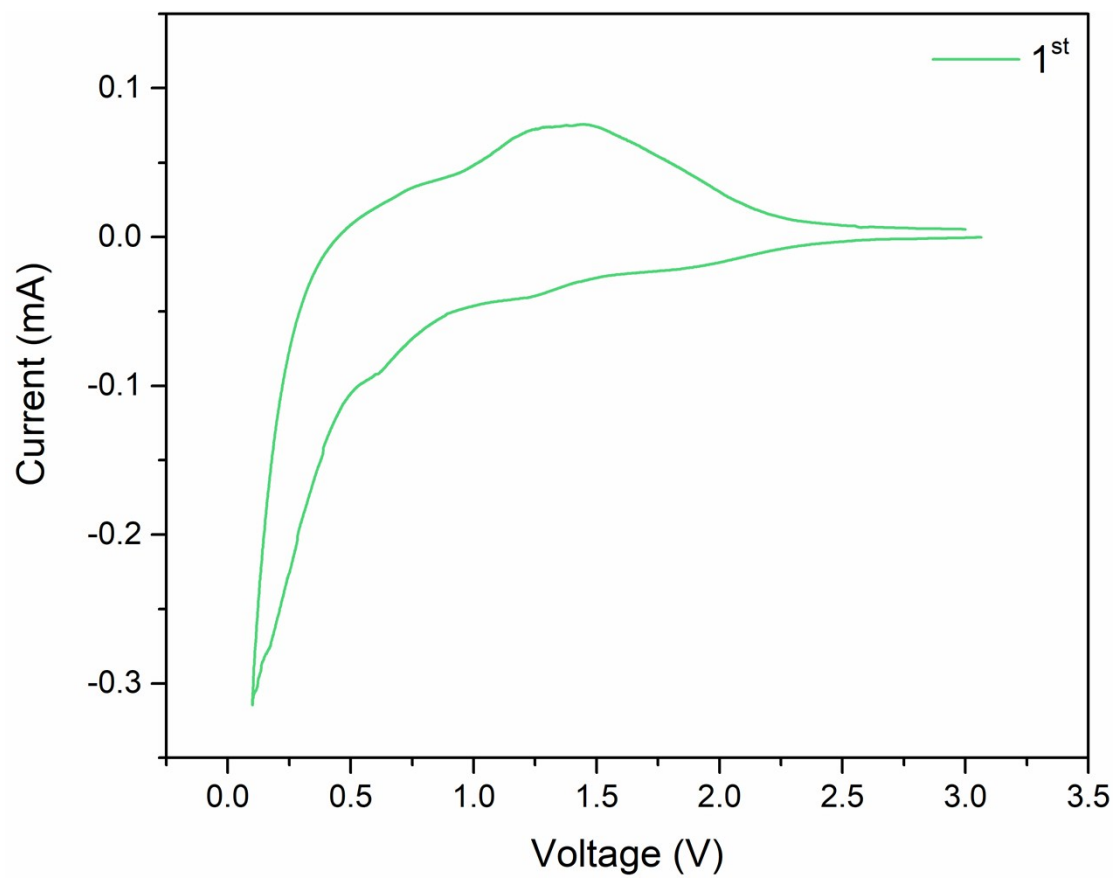

Fig. S3 first cycle of CV curves at a scan rate of 0.1 mV/s.

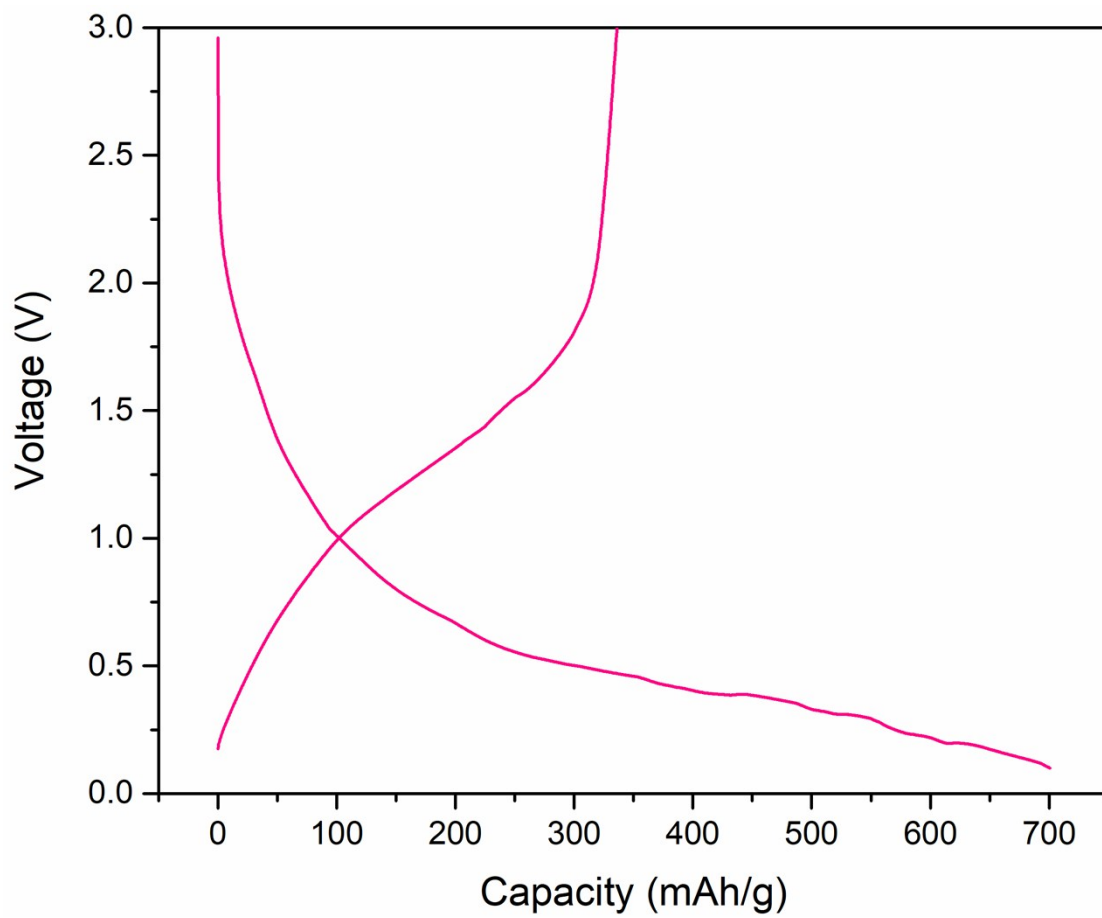

Fig. S4 the initial charge/discharge curve of NTSO at a current density of 100 mA/g.

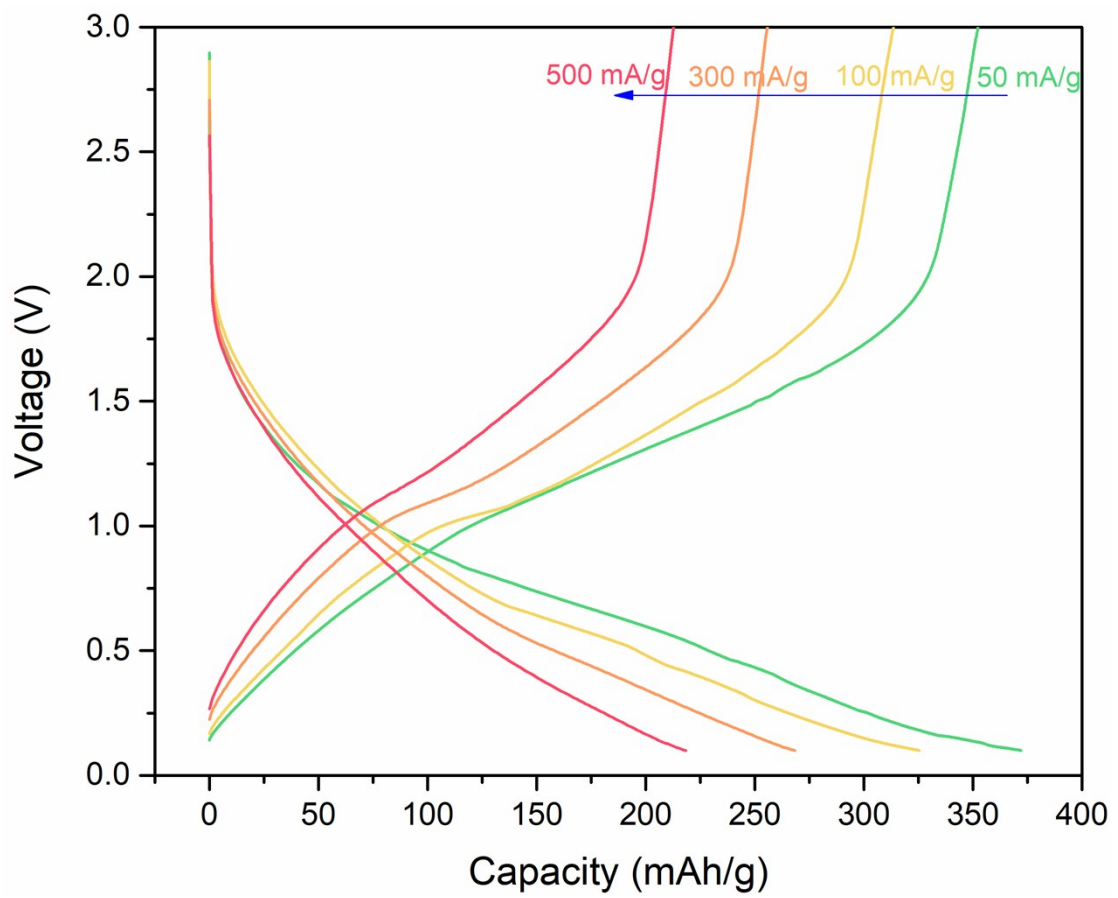

Fig. S5 the charge/discharge curves of NTSO at different current densities. The second cycle is used for the curve at 50 mA/g,



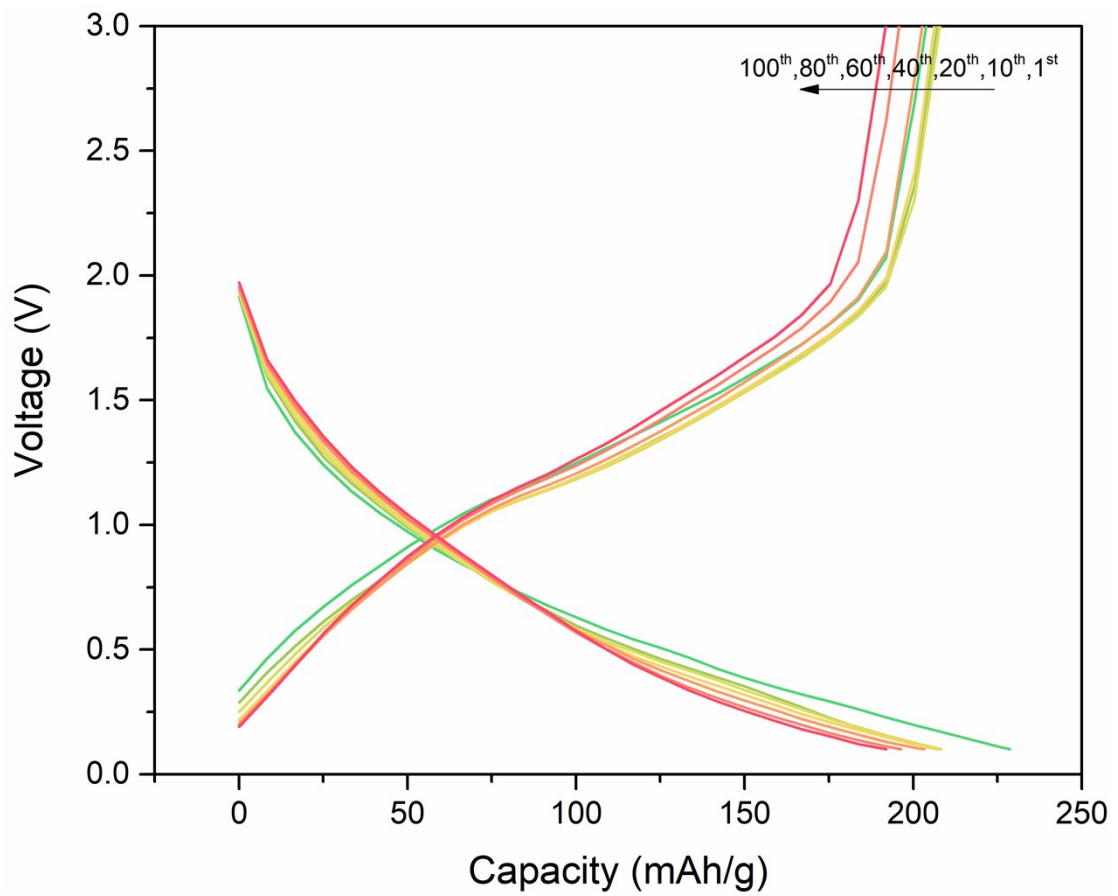

Fig. S6 the selected curves after different cycles at a current density of 500 mA/g, the interval time for date collection is bit of long and leads to the obvious incontinuity in the curves.

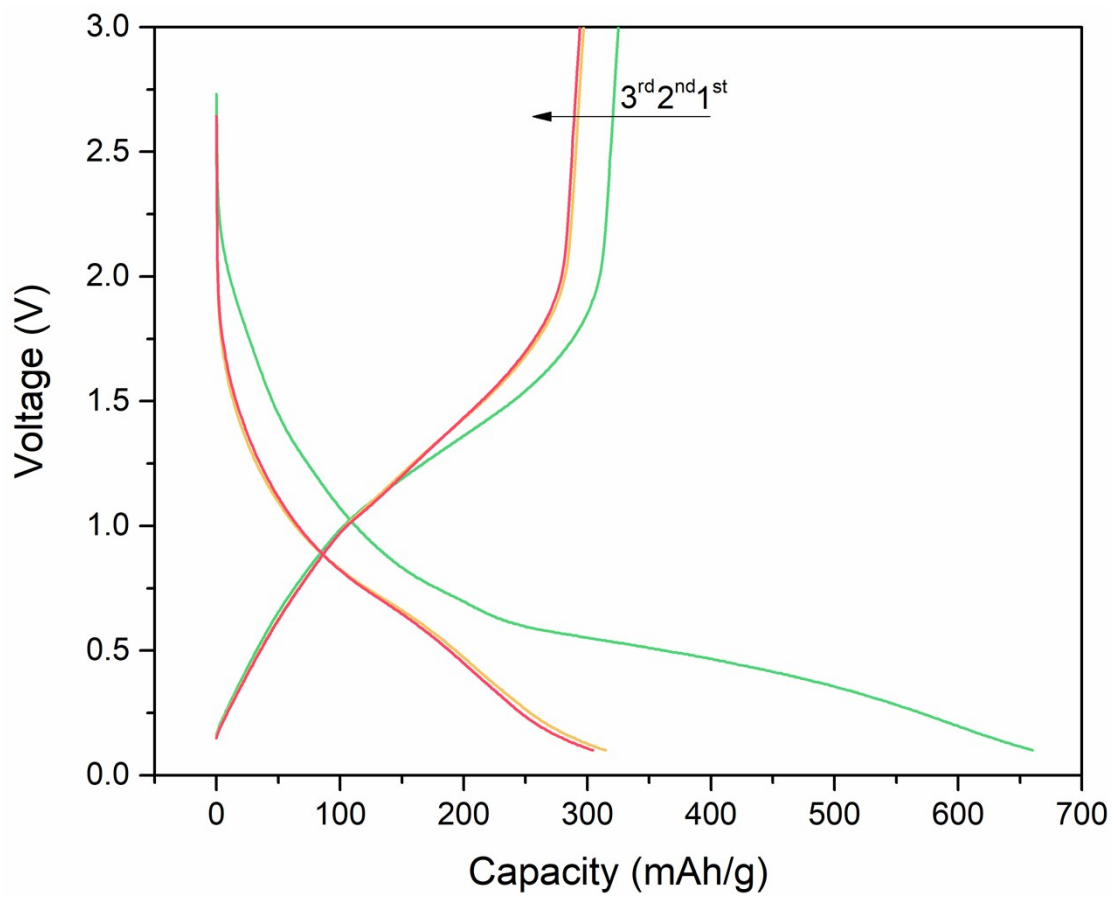

Fig. S7 first three cycles for battery activation under 20 mA/g and then tested at 500 mA/g for 100 cycles.
